# Supplementary material for: Immunodetection of human topoisomerase I-DNA covalent complexes
Source: PubMed Central journal article supplement — Nucleic Acids Res. 2016 Feb 24;44(6):2816–26. doi: 10.1093/nar/gkw109 (PMC4824114; doi:10.1093/nar/gkw109), 2016-02-24
Supplement: supp_gkw109_nar-03218-f-2015-File002.pdf [file supp_gkw109_nar-03218-f-2015-File002.pdf]

**Supplementary Material to**  
**Immunodetection of Human Topoisomerase I-DNA Covalent Complexes**

Anand G. Patel, Karen S. Flatten, Kevin L. Peterson, Thomas G. Beito,  
Paula A. Schneider, Angela L. Perkins, Daniel A. Harki and Scott H. Kaufmann

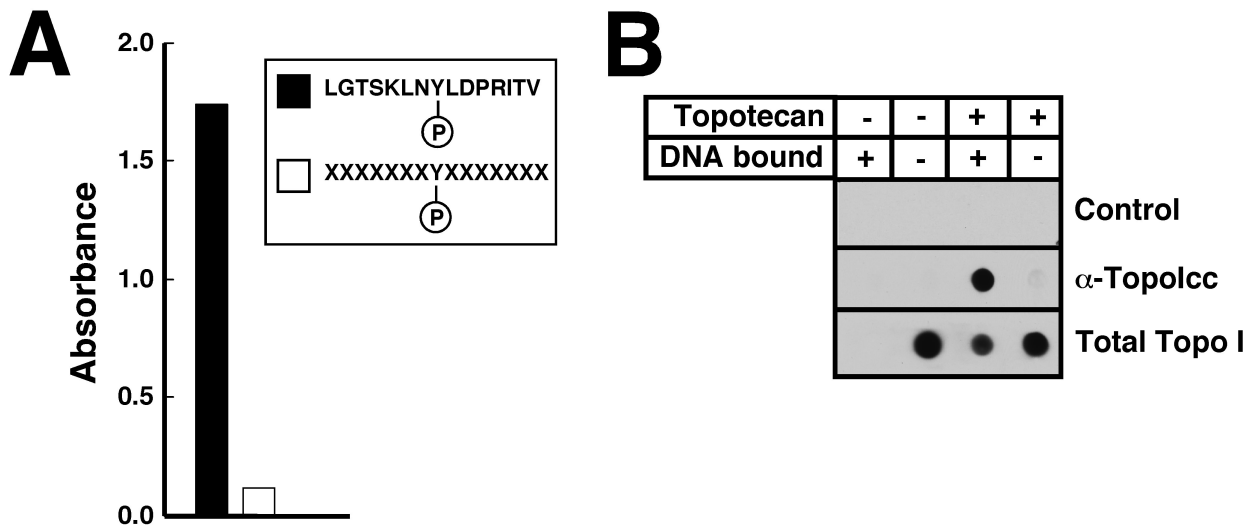

**Figure S1. Results of screening that yielded  $\alpha$ -TopoIcc.** **A**, results of primary screening ELISA against the indicated peptides. **B**, for secondary screening, pooled fractions containing free topo I and DNA-bound topo I from cesium chloride gradients (see Fig. 2A, TPT treatment) or the corresponding fractions from diluent treated cells were subjected to blotting with hybridoma supernatant or C-21 anti-topo I.  $\alpha$ -TopoIcc was unique among positive clones in its ability to react with topo I-DNA covalent complexes but not free topo I.

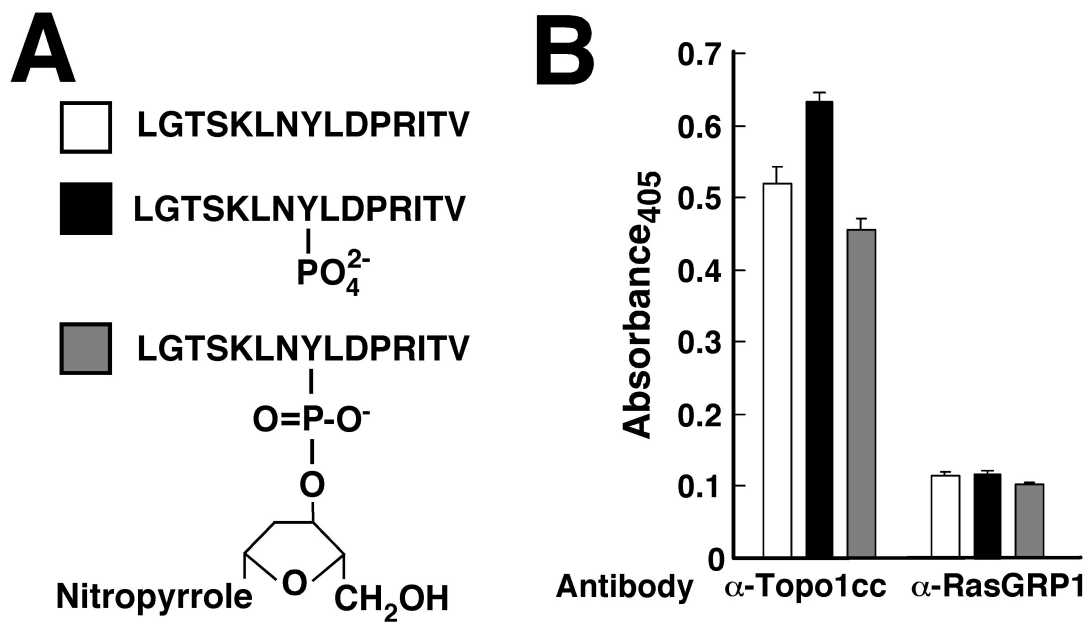

**Figure S2. Extended testing of  $\alpha$ -TopoIcc in ELISA assays.** **A**, Peptides used in ELISA assays. **B**, results obtained with  $\alpha$ -TopoIcc or previously described anti-RasGRP1 antibody (43) at 0.5  $\mu\text{g/ml}$ . Error bars in **B**,  $\pm$  SD of 3 replicate wells in one of two independent ELISA assays. Note that addition of the universal nucleoside analogue 1-(2'-deoxy- $\beta$ -D-ribofuranosyl)-3-nitropyrrole to the phosphorylated topo I peptide failed to increase the reactivity with  $\alpha$ -TopoIcc, suggesting that the epitope recognized by the antibody is more complicated than just the topo I-phosphate-deoxyribose moiety.

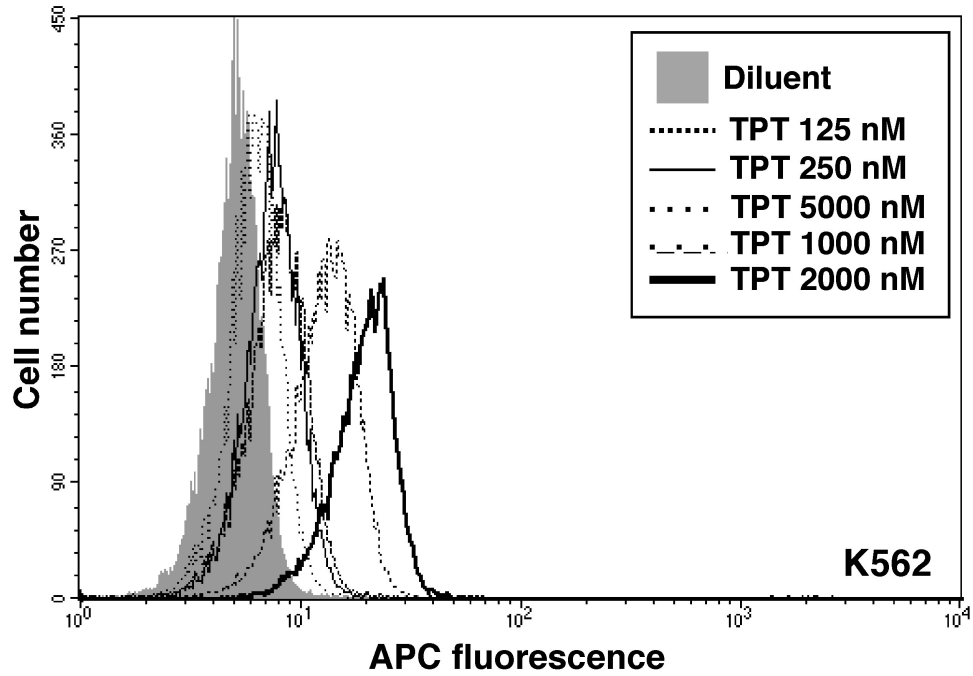

**Figure S3. Detection of topo I-DNA covalent complexes in topotecan-treated K562 cells.** Cells were treated for 1 h with the indicated concentration of topotecan, fixed, permeabilized with Triton X-100, incubated with SDS, and stained as described in the Methods.

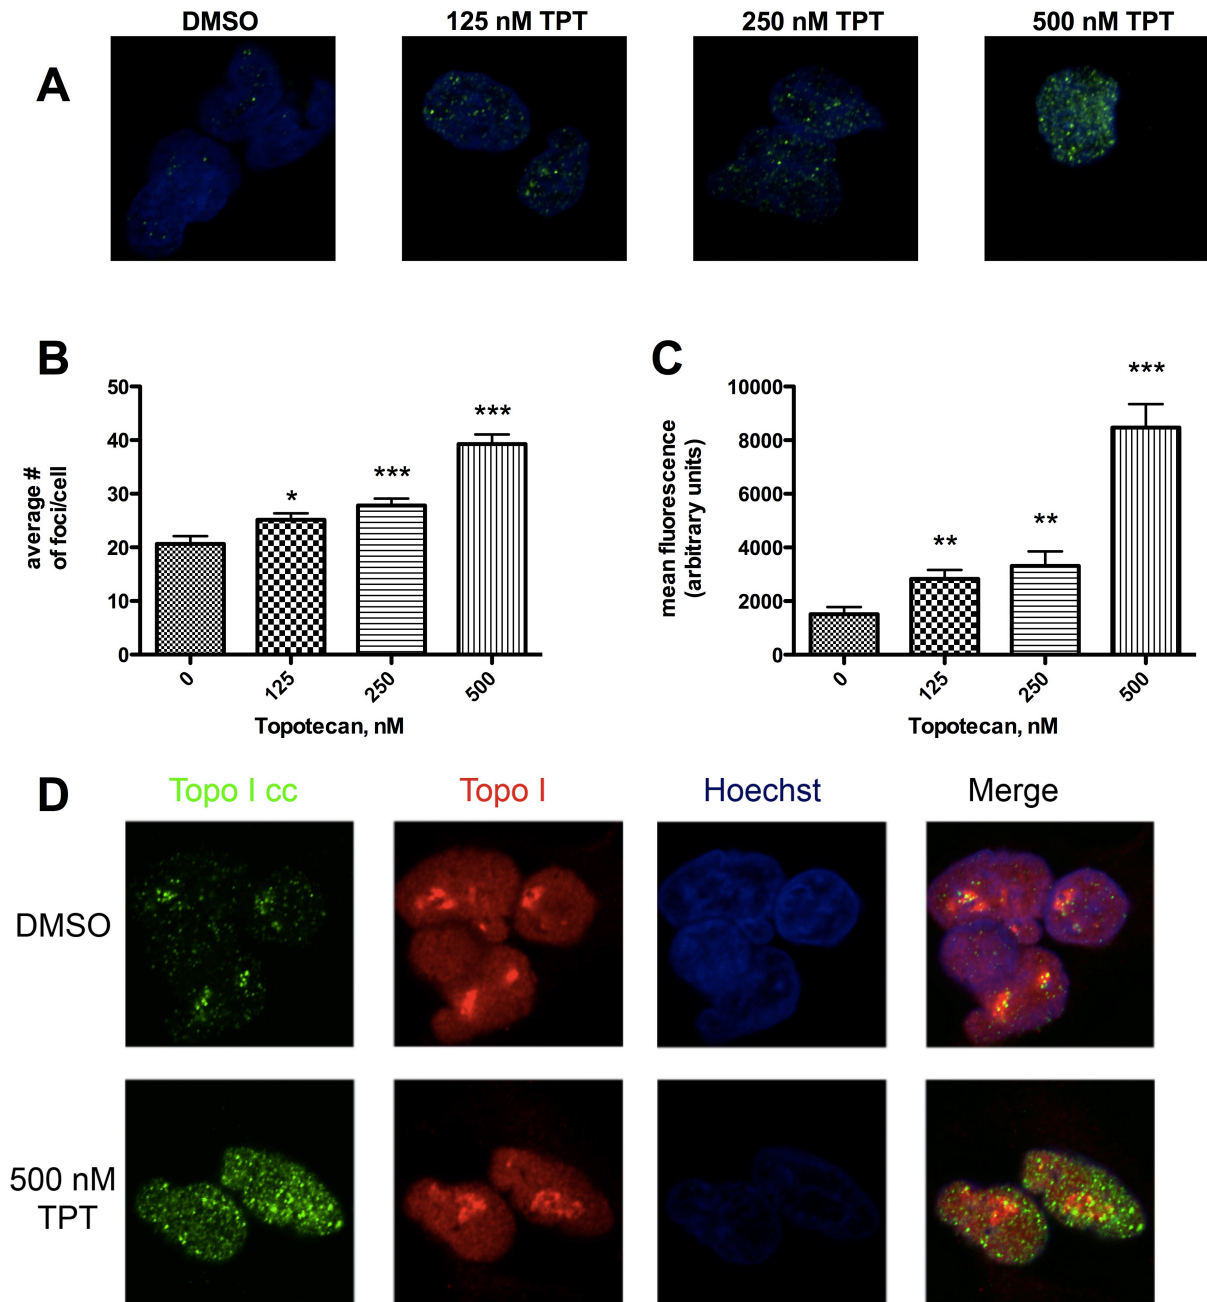

**Figure S4. Quantitation of topo I-DNA covalent complexes in intact cells after fluorescence microscopy.** **A**, A549 cells were stained with  $\alpha$ -TopoIcc antibody (green) and Hoechst 33258 (blue). **B**, Quantitation of foci numbers for at least 30 cells. **C**, Quantitation of maximal mean fluorescence intensity for 25 cells. Error bars in **B** and **C**,  $\pm$  SEM of 3 independent experiments. **D**, dual staining of topo I-DNA covalent complexes (green) and topo I (red) in A549 cells.

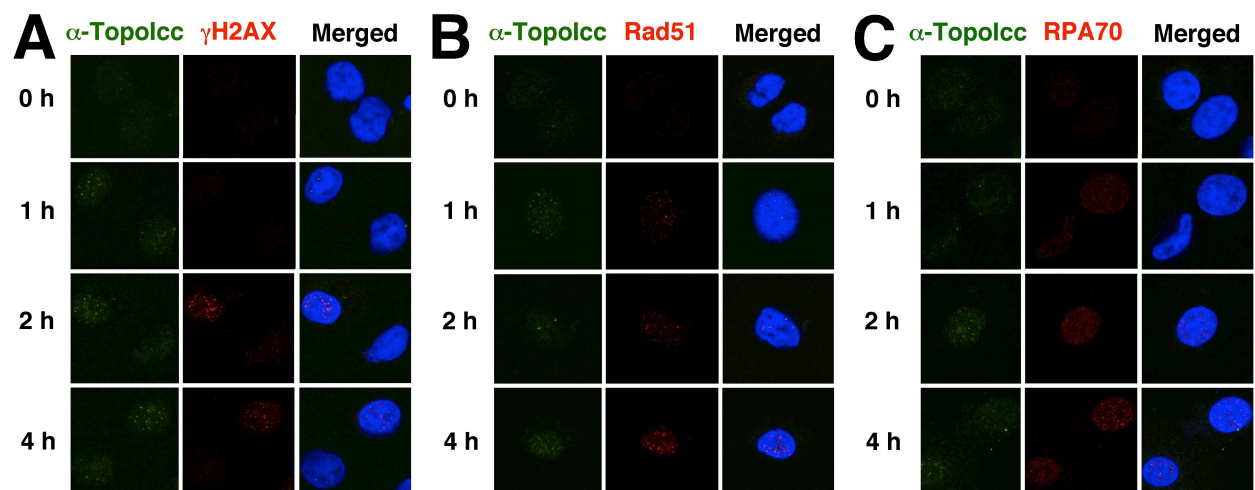

**Figure S5. Examination of topo I-DNA covalent complexes after treatment with 25 nM TPT.** A549 cells treated for up to 4 h with 25 nM TPT were fixed and stained with  $\alpha$ -TopoIcc along with anti-phospho-Ser<sup>139</sup>-H2AX (A), anti-Rad51 (B) or anti-RPA70 (C).
